# Supplementary material for: REST selectively represses a subset of RE1-containing neuronal genes in mouse embryonic stem cells
Source: Oxford University Press journal article supplement (doi:10.1242/dev.028548), 2009-02-07
Supplement: dev028548-sup-028548-figs4.pdf [file dev028548-sup-028548-figs4.pdf]

A

| Gene Symbol   | RE1 | Probe ID     | Rest-/- vs. WT |         | shREST vs. shCtrl |         |
|---------------|-----|--------------|----------------|---------|-------------------|---------|
|               |     |              | FC             | p-value | FC                | p-value |
| 1200015N20Rik |     | 1437062_s_at | 2.99           | 5E-05   | 3.11              | 4E-06   |
| 1500016G10Rik |     | 1452807_s_at | 1.80           | 4E-02   | 1.62              | 2E-03   |
| 2600009P04Rik |     | 1435871_at   | 1.80           | 2E-04   | 2.16              | 2E-04   |
| 2610024G14Rik |     | 1418222_at   | 2.32           | 6E-06   | 1.70              | 4E-04   |
| 3632451O06Rik |     | 1450770_at   | 2.01           | 5E-04   | 1.57              | 1E-02   |
| 6330407J23Rik |     | 1429628_at   | 2.79           | 2E-04   | 2.74              | 1E-04   |
| Abcb6         |     | 1422524_at   | 2.34           | 1E-05   | 1.44              | 3E-03   |
| Acsl6         | X   | 1451257_at   | 2.46           | 7E-05   | 1.60              | 8E-03   |
| AU040320      |     | 1452150_at   | 2.12           | 6E-05   | 1.58              | 9E-03   |
| Bex2          | X   | 1417388_at   | 2.07           | 7E-03   | 2.34              | 1E-05   |
| Bruno14       |     | 1452240_at   | 1.61           | 3E-04   | 1.46              | 2E-02   |
| Car3          | X   | 1449434_at   | 2.87           | 3E-03   | 5.37              | 4E-05   |
| Ccdc64        |     | 1426816_at   | 1.75           | 1E-04   | 1.89              | 1E-04   |
| Cdk5r1        |     | 1433451_at   | 1.74           | 4E-04   | 1.50              | 6E-03   |
| Celsr3        | X   | 1425067_at   | 5.70           | 2E-07   | 4.29              | 8E-07   |
| Chga          |     | 1418149_at   | 6.95           | 1E-08   | 2.75              | 2E-05   |
| Chmb2         | X   | 1436428_at   | 2.79           | 6E-06   | 1.46              | 9E-03   |
| Ckmt1         |     | 1417089_a_at | 3.29           | 2E-05   | 2.27              | 7E-04   |
|               |     | 1432418_a_at | 2.84           | 7E-04   | 2.08              | 5E-03   |
| Cplx1         | X   | 1417746_at   | 3.52           | 3E-06   | 2.05              | 1E-04   |
| Crip2         | X   | 1417311_at   | 1.71           | 3E-04   | 1.72              | 2E-04   |
| Crmp1         |     | 1448289_at   | 1.70           | 5E-02   | 2.46              | 4E-05   |
| Cyr61         |     | 1457823_at   | 1.45           | 8E-03   | 1.46              | 5E-02   |
| Dpp4          |     | 1416697_at   | 0.63           | 7E-03   | 0.52              | 8E-03   |
| Dppa3         |     | 1424295_at   | 2.25           | 3E-03   | 1.90              | 2E-03   |
| E130309D14Rik |     | 1433673_at   | 2.28           | 1E-04   | 1.63              | 7E-03   |
| Elavl3        |     | 1452524_a_at | 1.42           | 3E-02   | 1.45              | 6E-03   |
| Elov12        |     | 1416444_at   | 3.86           | 7E-06   | 3.02              | 8E-06   |
| Epas1         |     | 1435436_at   | 1.54           | 3E-03   | 1.47              | 2E-02   |
| Epha4         |     | 1429021_at   | 0.19           | 1E-07   | 0.59              | 3E-03   |
| Exoc31        |     | 1436536_at   | 2.74           | 9E-06   | 1.65              | 3E-02   |
| Galnt9        |     | 1434055_at   | 2.86           | 1E-06   | 2.40              | 8E-05   |
| Gdap1         | X   | 1423328_at   | 7.66           | 8E-07   | 3.67              | 3E-05   |
| Gdap111       | X   | 1424935_at   | 2.08           | 1E-03   | 1.51              | 4E-03   |
| Gm50          |     | 1455202_at   | 1.45           | 2E-03   | 1.49              | 9E-03   |
| Gmptg         | X   | 1436526_at   | 4.04           | 8E-06   | 2.16              | 6E-05   |
| Gps2          |     | 1417796_at   | 1.75           | 1E-03   | 1.66              | 8E-04   |
| Hagh          |     | 1424171_a_at | 1.43           | 3E-03   | 1.43              | 4E-03   |
| Hcn3          | X   | 1451023_at   | 1.96           | 2E-04   | 1.72              | 6E-04   |
| Igfbp3        |     | 1423062_at   | 1.66           | 6E-03   | 1.63              | 4E-04   |
| Ina           |     | 1448991_a_at | 2.09           | 3E-03   | 2.37              | 8E-04   |
| Kenb1         |     | 1423179_at   | 1.46           | 5E-03   | 1.63              | 6E-04   |
| Ldoc1         |     | 1435815_at   | 1.67           | 3E-02   | 1.43              | 7E-03   |
| Letmd1        |     | 1418860_a_at | 2.01           | 3E-04   | 1.89              | 1E-02   |
| LOC100039489  |     | 1433507_a_at | 1.56           | 5E-04   | 1.44              | 3E-03   |
| Madd          |     | 1455502_at   | 1.45           | 8E-03   | 1.55              | 8E-04   |
| Mapk11        | X   | 1421926_at   | 1.56           | 3E-03   | 1.57              | 5E-03   |
| Mapk8ip2      | X   | 1449225_a_at | 1.83           | 7E-03   | 1.96              | 8E-05   |
| March11       | X   | 1455947_at   | 1.86           | 4E-04   | 1.43              | 1E-02   |
| Mterfd3       |     | 1455700_at   | 1.51           | 2E-03   | 1.49              | 3E-03   |
| Nefh          |     | 1424847_at   | 1.58           | 2E-02   | 1.73              | 1E-02   |
| Nefl          |     | 1426255_at   | 1.61           | 2E-02   | 2.02              | 3E-03   |
| Neurod1       | X   | 1426413_at   | 1.67           | 5E-02   | 1.60              | 2E-02   |
|               | X   | 1426412_at   | 1.51           | 2E-02   | 1.63              | 2E-02   |
| Obfc2b        |     | 1451291_at   | 1.77           | 3E-04   | 1.60              | 8E-04   |
| Pank1         |     | 1431028_a_at | 0.63           | 5E-03   | 0.68              | 3E-03   |
| Pclo          |     | 1419392_at   | 2.20           | 6E-03   | 1.60              | 3E-03   |
| Phf21b        |     | 1454999_at   | 2.02           | 3E-05   | 1.64              | 6E-03   |
| Phyhlpl       |     | 1427023_at   | 2.29           | 2E-04   | 2.34              | 2E-05   |
| Pias3         |     | 1451115_at   | 1.63           | 2E-04   | 1.42              | 9E-03   |
| Rab28         |     | 1423990_at   | 1.62           | 2E-04   | 1.74              | 1E-04   |
| Rab39         |     | 1437762_at   | 3.07           | 4E-06   | 2.80              | 3E-05   |
| Rab3c         |     | 1432432_a_at | 2.26           | 5E-04   | 1.87              | 2E-03   |
| Rel2          |     | 1434147_at   | 1.79           | 2E-03   | 1.86              | 4E-03   |
| Rgs17         |     | 1450693_at   | 1.58           | 2E-02   | 1.64              | 4E-04   |
| Rhbdf1        | X   | 1424138_at   | 1.61           | 2E-03   | 1.71              | 1E-03   |
| Rims2         |     | 1450761_s_at | 1.57           | 4E-04   | 1.56              | 3E-02   |
|               |     | 1422809_at   | 1.55           | 2E-03   | 1.89              | 1E-02   |
| Rtn2          | X   | 1419056_at   | 1.78           | 3E-03   | 1.99              | 9E-04   |
| Rundc3a       | X   | 1449246_at   | 2.19           | 5E-06   | 1.52              | 8E-04   |
|               | X   | 1436674_at   | 1.50           | 3E-03   | 1.85              | 2E-04   |
| Scap          |     | 1433520_at   | 1.50           | 1E-03   | 1.49              | 2E-03   |
| Scg3          | X   | 1448628_at   | 18.68          | 3E-08   | 4.57              | 4E-07   |
| Scg5          |     | 1423150_at   | 6.28           | 4E-07   | 2.81              | 6E-06   |
| Scn3b         | X   | 1435767_at   | 2.26           | 3E-04   | 2.72              | 4E-05   |
| Sgcb          |     | 1419668_at   | 3.08           | 8E-07   | 1.75              | 2E-03   |
| Sirt7         |     | 1424238_at   | 1.61           | 1E-03   | 1.66              | 4E-04   |
| Slc40a1       |     | 1417061_at   | 1.95           | 2E-03   | 2.04              | 1E-04   |
| Smpd3         |     | 1438665_at   | 1.45           | 2E-02   | 1.71              | 3E-04   |
| Snap25        |     | 1416828_at   | 9.54           | 3E-09   | 1.71              | 8E-04   |
| Snx1          |     | 1416260_a_at | 2.37           | 1E-05   | 1.98              | 2E-05   |
| Stmn3         | X   | 1460181_at   | 6.26           | 5E-07   | 4.65              | 3E-06   |
|               | X   | 1435113_x_at | 6.26           | 2E-07   | 5.04              | 5E-07   |
| Stx1a         |     | 1437390_x_at | 1.61           | 8E-03   | 1.51              | 2E-02   |
| Syp           | X   | 1448280_at   | 4.23           | 1E-05   | 3.27              | 2E-05   |
| Syt4          | X   | 1415845_at   | 1.75           | 7E-05   | 1.46              | 2E-03   |
| Tcerg11       |     | 1431835_at   | 1.97           | 2E-03   | 1.56              | 2E-03   |
|               |     | 1457133_at   | 1.75           | 2E-03   | 1.68              | 2E-04   |
| Tmhs          | X   | 1429266_at   | 2.79           | 5E-05   | 1.96              | 3E-04   |
| Tob2          |     | 1448666_s_at | 1.49           | 2E-03   | 2.01              | 5E-04   |
| Ttc9b         |     | 1429416_at   | 1.80           | 7E-04   | 2.33              | 1E-05   |
| Unc13a        | X   | 1437472_at   | 4.02           | 8E-07   | 3.63              | 1E-05   |
| Vgf           |     | 1436094_at   | 14.23          | 2E-06   | 3.52              | 1E-06   |

B

| Category  | Term           | RT | Genes | Count | %    | P-Value | Bonferroni |
|-----------|----------------|----|-------|-------|------|---------|------------|
| UP_TISSUE | Brain          |    |       | 38    | 43.7 | 5.6E-5  | 2.4E-2     |
| UP_TISSUE | Hippocampus    |    |       | 12    | 13.8 | 1.2E-4  | 4.9E-2     |
| UP_TISSUE | Cerebellum     |    |       | 17    | 19.5 | 2.7E-4  | 1.1E-1     |
| UP_TISSUE | Eye            |    |       | 15    | 17.2 | 5.1E-4  | 1.9E-1     |
| UP_TISSUE | Brain cortex   |    |       | 9     | 10.3 | 9.5E-4  | 3.3E-1     |
| UP_TISSUE | Retina         |    |       | 9     | 10.3 | 2.6E-3  | 6.7E-1     |
| UP_TISSUE | Olfactory bulb |    |       | 4     | 4.6  | 1.7E-2  | 1.0E0      |
| UP_TISSUE | Spinal cord    |    |       | 7     | 8.0  | 1.7E-2  | 1.0E0      |
