# Supplementary figures and images for: REST selectively represses a subset of RE1-containing neuronal genes in mouse embryonic stem cells
Source: Oxford University Press journal article supplement (doi:10.1242/dev.028548), 2009-02-07

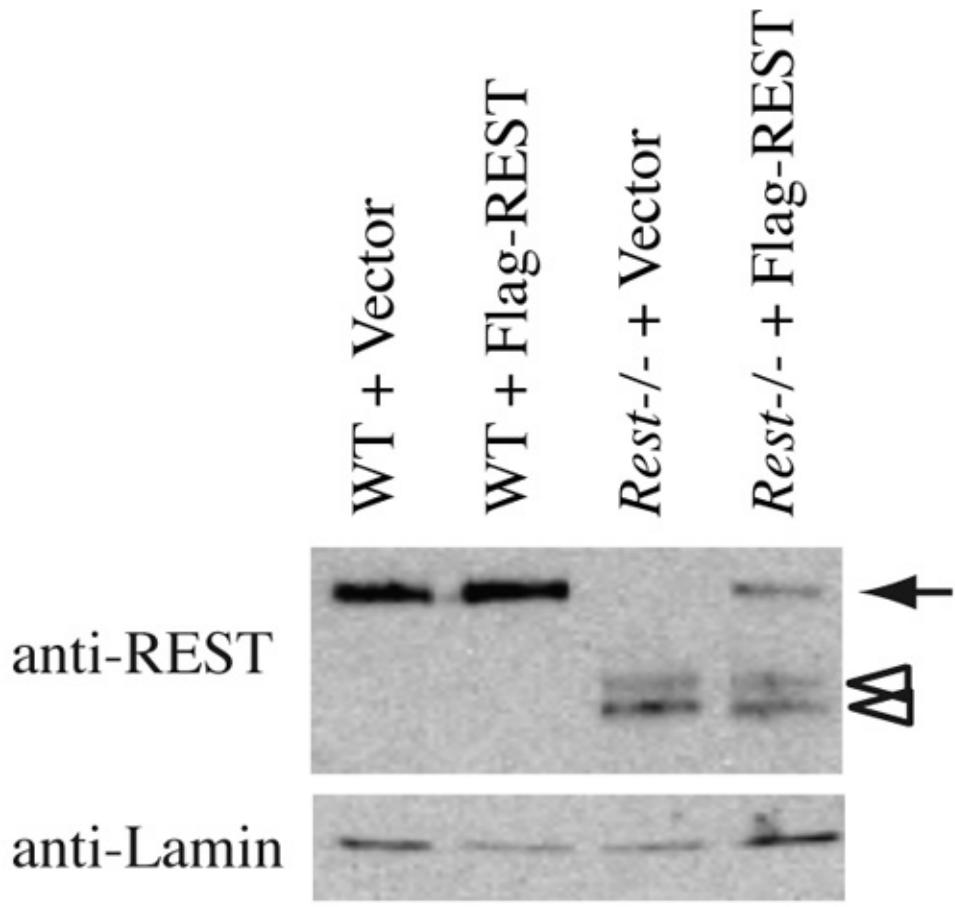

Supplement: dev028548-sup-028548-figs5.pdf [file dev028548-sup-028548-figs5.pdf]

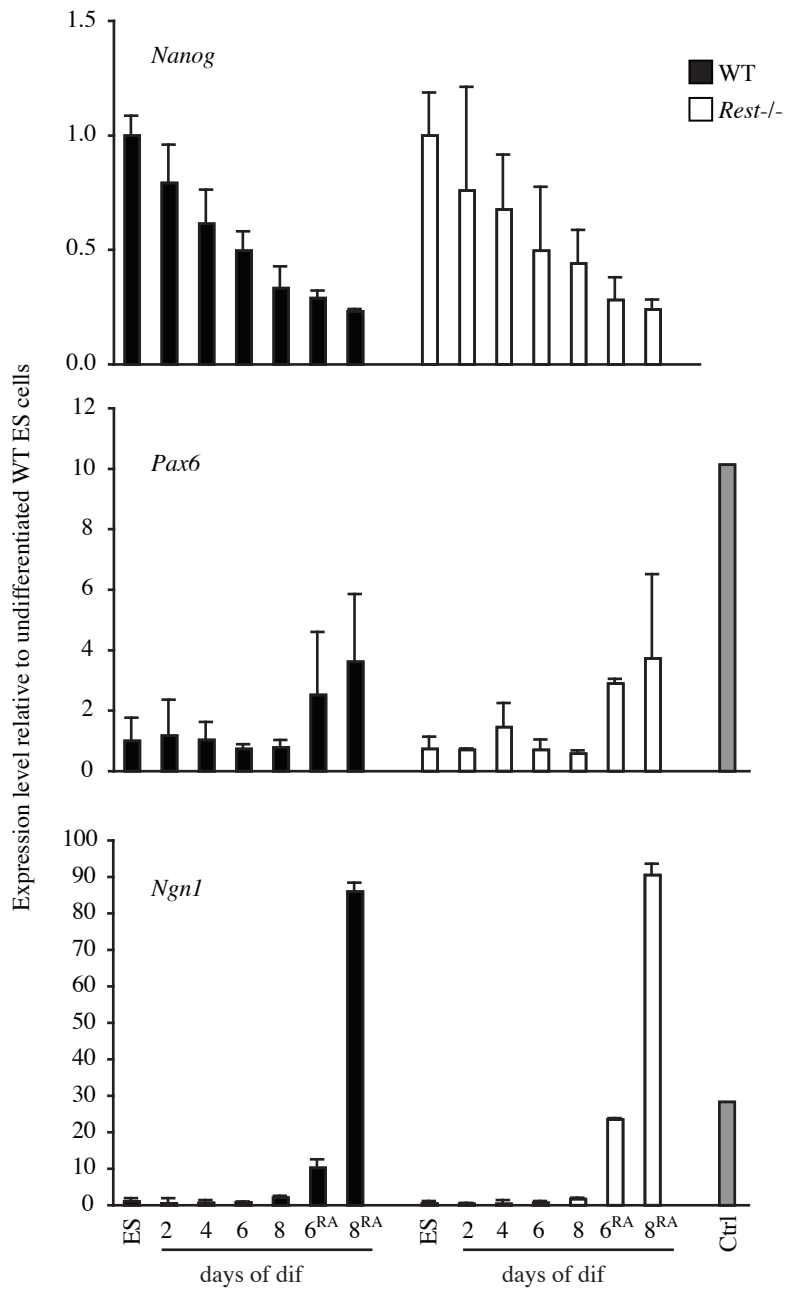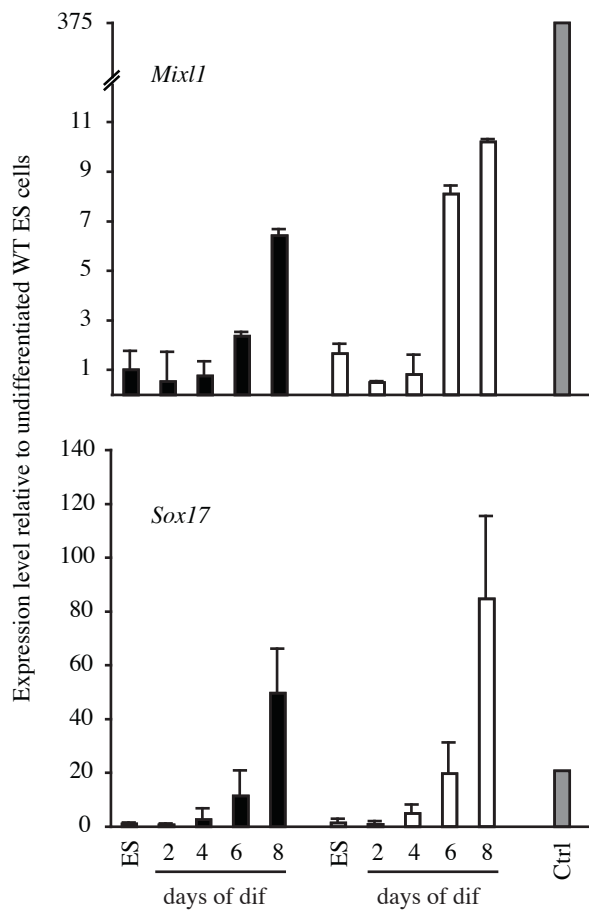

Supplement: dev028548-sup-028548-figs7.pdf [file dev028548-sup-028548-figs7.pdf]
